# Supplementary material for: Breached Barriers: A Scoping Review of Blood-Central Nervous System Barrier Pathology in Amyotrophic Lateral Sclerosis
Source: Frontiers journal article supplement (doi:10.3389/fncel.2022.851563), 2022-03-31
Supplement: Image_2.PDF [file Image_2.PDF]

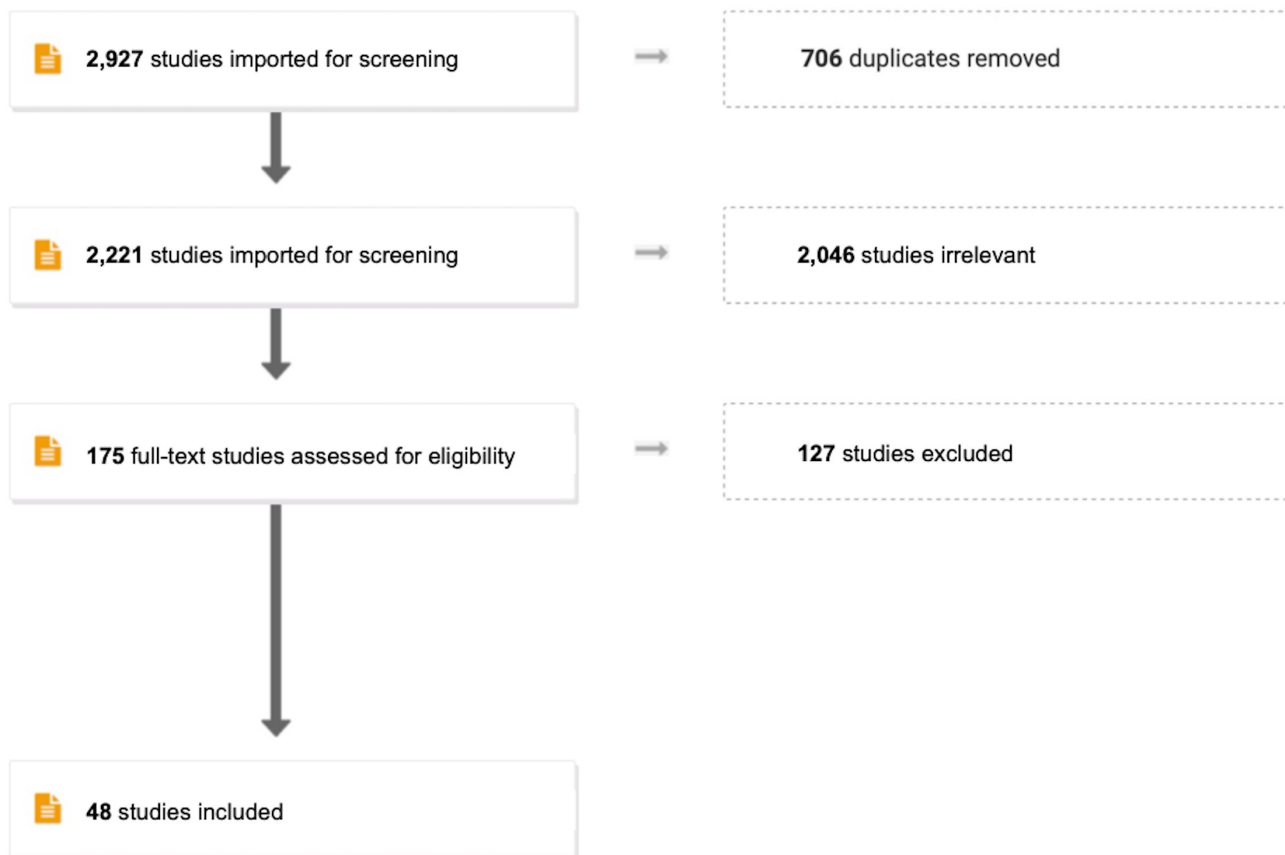

**Supplementary Figure 2. PRISMA flow diagram.**
